# Supplementary material for: Facile synthesis of Bi/BiVO4 composite ellipsoids with high photocatalytic activity
Source: Royal Society of Chemistry journal article supplement (doi:10.1039/c7dt04475e), 2018-01-01
Supplement: c7dt04475e1.pdf [file c7dt04475e1.pdf]

## Supporting Information

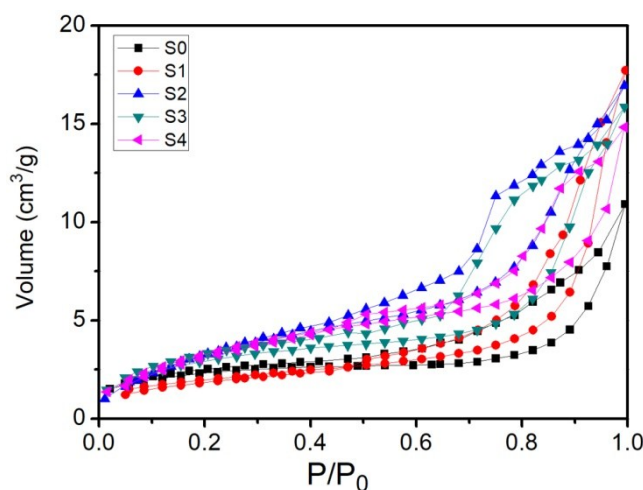

Figure S1 N<sub>2</sub> adsorption-desorption isotherms of S0, S1, S2, S3, and S4 sample.

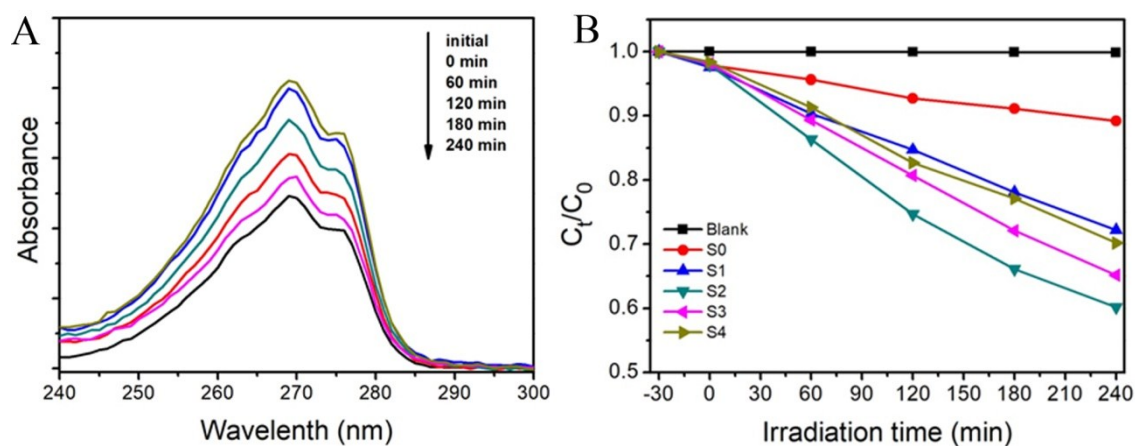

Figure S2 (A) Absorption spectra of phenol solution at different irradiation times in the presence of S2. (B) Photocatalytic degradation ratio of phenol versus irradiation time by using different samples.
